# Supplementary material for: GADD45B as a Prognostic and Predictive Biomarker in Stage II Colorectal Cancer
Source: MDPI journal article supplement (doi:10.3390/genes9070361), 2018-07-19
Supplement: s1 [file s1]

## Supplementary Files

**Table S1.**

### Cox analyses of potential prognostic factors for overall survival in the stage II CRC cohort

| Factor                   | Comparison                                     | Univariate Analysis |             |         | Multivariate Analysis |             |         |
|--------------------------|------------------------------------------------|---------------------|-------------|---------|-----------------------|-------------|---------|
|                          |                                                | HR                  | 95%CI       | p value | HR                    | 95%CI       | p value |
| Age(years)               | < 65 vs. ≥65                                   | 1.502               | 0.949-2.379 | 0.083   |                       |             |         |
| Gender                   | Female vs. Male                                | 0.901               | 0.721-1.125 | 0.356   |                       |             |         |
| Tumor Location           | Colon Cancer vs.<br>Rectal Cancer              | 0.940               | 0.752-1.174 | 0.585   |                       |             |         |
| Gross Pathological Type  | Prominence.<br>vs.<br>Ulceration &Infiltration | 1.312               | 0.837-2.057 | 0.237   |                       |             |         |
| T stage                  | T3 vs. T4                                      | 1.493               | 0.687-3.247 | 0.312   |                       |             |         |
| Grade                    | High& Middle vs. Low                           | 1.013               | 0.548-1.874 | 0.967   |                       |             |         |
| Neurological Involvement | Present vs. Absent                             | 1.731               | 0.796-3.763 | 0.166   |                       |             |         |
| Vascular Invasion        | Present vs. Absent                             | 0.553               | 0.206-1.484 | 0.240   |                       |             |         |
| Adjuvant Therapy         | Yes vs. No                                     | 0.821               | 0.528-1.278 | 0.383   |                       |             |         |
| Chemotherapy             | Yes vs. No                                     | 1.045               | 0.648-1.688 | 0.856   |                       |             |         |
| CEA level.<br>(ng/ml)    | ≤5vs.>5                                        | 0.925               | 0.534-1.602 | 0.780   |                       |             |         |
| CA19-9 level.<br>(U/ml)  | ≤37vs.>37                                      | 0.675               | 0.247-1.847 | 0.444   |                       |             |         |
| MSI status               | MSI vs. MSS                                    | 0.343               | 0.126-0.939 | 0.037   | 0.379                 | 0.138-1.039 | 0.059   |
| GADD45B expression       | LOW vs. HIGH                                   | 0.459               | 0.292-0.721 | 0.001   | 0.479                 | 0.305-0.753 | 0.001   |

**Table S2****Cox analyses of potential prognostic factors for progression-free survival in the stage II CRC cohort**

| Factor                   | Comparison                                    | Univariate Analysis |             |         | Multivariate Analysis |             |         |
|--------------------------|-----------------------------------------------|---------------------|-------------|---------|-----------------------|-------------|---------|
|                          |                                               | HR                  | 95%CI       | p value | HR                    | 95%CI       | p value |
| Age(years)               | < 65 vs. ≥65                                  | 1.163               | 0.781-1.730 | 0.458   |                       |             |         |
| Gender                   | Female vs. Male                               | 0.926               | 0.635-1.351 | 0.690   |                       |             |         |
| Tumor Location           | Colon Cancer vs.<br>Rectal Cancer             | 0.966               | 0.802-1.164 | 0.717   |                       |             |         |
| Gross Pathological Type  | Prominence<br>vs.<br>Ulceration& Infiltration | 1.194               | 0.820-1.738 | 0.356   |                       |             |         |
| T Stage                  | T3 vs. T4                                     | 1.337               | 0.676-2.644 | 0.404   |                       |             |         |
| Grade                    | High& Middle vs. Low                          | 1.078               | 0.643-1.806 | 0.777   |                       |             |         |
| Neurological Involvement | Present vs. Absent                            | 2.222               | 1.191-4.145 | 0.012   | 2.066                 | 1.107-3.858 | 0.023   |
| Vascular Invasion        | Present vs. Absent                            | 0.948               | 0.575-1.562 | 0.834   |                       |             |         |
| Adjuvant Therapy         | Yes vs. No                                    | 0.908               | 0.626-1.318 | 0.613   |                       |             |         |
| Chemotherapy             | Yes vs. No                                    | 1.092               | 0.723-1.650 | 0.675   |                       |             |         |
| CEA level<br>(ng/ml)     | ≤5 vs. > 5                                    | 1.088               | 0.697-1.698 | 0.711   |                       |             |         |
| CA19-9 level<br>(U/ml)   | ≤37 vs. >37                                   | 0.720               | 0.316-1.640 | 0.435   |                       |             |         |
| MSI status               | MSI vs. MSS                                   | 0.625               | 0.326-1.197 | 0.157   |                       |             |         |
| GADD45B expression       | LOW vs. HIGH                                  | 0.480               | 0.330-0.699 | 0.0001  | 0.490                 | 0.336-0.714 | 0.0002  |
